# Supplementary material
Source: publisher figshare collection journal article supplement (https://tandf.figshare.com/ndownloader/files/35118451)
Supplement: Supplementary file 1 [file 35118451]

## Sheet: table 1
Sample ID	Depth	Dens20	Dens25	Salinity	Ca	Mg	Na	K	DIC	TA	Cl	SO4		Salinity	Ca	Mg	Na	K	DIC	TA	Cl	SO4		Salinity	Ca	Mg	Na	K	DIC	TA	Cl	SO4
		PhreeqC	PhreeqC						PhreeqC					25°C	25°C	25°C	25°C	25°C	25°C	25°C	25°C	25°C		25°C	25°C	25°C	25°C	25°C	25°C	25°C	25°C	25°C
	cm	kg L-1	kg L-1	g kg-1	mmol kg-1	mmol kg-1	mmol kg-1	mmol kg-1	mmol kg-1	mmol kg-1	mmol kg-1	mmol kg-1		g L-1	mmol L-1	mmol L-1	mmol L-1	mmol L-1	mmol L-1	mmol L-1	mmol L-1	mmol L-1		g L-1	µmol cm-2 d-1	µmol cm-2 d-1	µmol cm-2 d-1	µmol cm-2 d-1	µmol cm-2 d-1	µmol cm-2 d-1	µmol cm-2 d-1	µmol cm-2 d-1
															µmol cm-3	µmol cm-3	µmol cm-3	µmol cm-3	µmol cm-3	µmol cm-3	µmol cm-3	µmol cm-3
ALD_CC_02	0	1.03248	1.03099	45.3721	13.5031	68.2571	604.542	12.9052	2.40284	3.26399	704.18	36.4152		46.7782	13.9215	70.3723	623.277	13.3051	2.4773	3.36514	726.003	37.5437			0.130237	3.42715	46.4526	1.41063	2.99884	2.60103	81.0165	1.79381
CC_K04_01	2	1.04098	1.03941	56.4656	14.0898	88.8401	748.616	15.8851	13.3119	12.7164	869.408	43.4329		58.6909	14.6451	92.3413	778.119	16.5111	13.8365	13.2175	903.671	45.1446			0.404126	1.9811	31.2754	0.820046	-1.00428	-1.00177	56.1094	2.08669
CC_K04_02	4.5	1.048	1.04637	65.4919	16.6781	103.42	868.176	18.0059	8.67899	8.09876	1010.62	53.7066		68.5288	17.4515	108.215	908.433	18.8408	9.08143	8.4743	1057.48	56.197			0.369811	1.70498	29.1839	0.812011	-0.311521	-0.290006	51.68	1.42984
CC_K04_03	7	1.05434	1.05266	73.6542	19.0181	115.78	978.505	20.0897	7.22591	6.74593	1139.16	60.5801		77.5329	20.0196	121.877	1030.03	21.1476	7.60643	7.10117	1199.15	63.7703			0.275794	1.11928	19.727	0.508761	-0.221528	-0.191137	35.102	0.927264
CC_K04_04	10	1.05945	1.05772	80.198	21.1	125.401	1067.08	21.6334	6.00135	5.68691	1242.87	65.8623		84.8271	22.3179	132.639	1128.67	22.882	6.34775	6.01516	1314.61	69.6639			0.094345	0.286105	7.18167	0.228404	-0.161223	-0.143513	12.8146	0.164058
CC_K04_05	13	1.06116	1.05941	82.4315	21.8085	127.798	1099.27	22.3338	5.1271	4.90815	1280.68	66.7415		87.3288	23.1041	135.39	1164.58	23.6607	5.4317	5.19974	1356.77	70.7066			0.0384871	-0.0863939	0.421922	0.0405018	-0.0434351	-0.0426653	0.587254	-0.0117916
CC_K04_06	16.5	1.06121	1.05947	82.5284	22.1604	126.876	1101.53	22.4846	4.85505	4.64093	1282.74	66.6552		87.4363	23.4783	134.421	1167.04	23.8218	5.14378	4.91692	1359.02	70.6192			0.0307578	-0.0229481	-0.544947	0.00935561	0.0098628	-0.00126221	-0.671089	-0.0357252
CC_K04_07	20	1.06109	1.05934	82.365	22.4454	126.649	1098.66	22.5225	4.91736	4.6336	1280.46	66.4133		87.2526	23.7774	134.164	1163.86	23.859	5.20916	4.90856	1356.44	70.3543			-0.0164219	0.0528405	-1.33265	-0.0664123	-0.0174704	-0.0156818	-1.82154	0.00677937
CC_K04_08	23.5	1.06081	1.05907	81.978	22.3004	127.241	1091.6	22.2788	4.80927	4.53663	1274.19	66.4777		86.8204	23.6177	134.757	1156.08	23.5949	5.09335	4.80461	1349.45	70.4046			-0.00126056	0.00329294	0.181577	-0.0350053	0.0296182	0.0244741	0.06662	-0.0121896
CC_K04_09	27	1.06083	1.05909	82.005	22.2884	127.273	1092.58	22.147	4.99456	4.68972	1274.41	66.3911		86.8507	23.6054	134.794	1157.14	23.4556	5.28968	4.96684	1349.71	70.3142			-0.034351	-0.277434	-4.16953	-0.0892538	0.0440342	0.0376583	-7.27483	-0.264868
CC_K04_10	30.5	1.05954	1.05781	80.3753	21.9997	124.485	1070.91	21.8382	5.27654	4.93139	1249.55	64.6147		85.0218	23.2715	131.681	1132.82	23.1006	5.58158	5.21647	1321.79	68.3501			0.27468	1.34704	22.285	0.66651	0.0966253	0.0903048	39.5237	1.05775
Boudreau,1997			correction of ambient temperature
D0=(m0+m1*t)				D0		D0SW			D0SW	Porosity	Tortuosity	Dsed = D0 / θ2	Dsed		compare with Schulz and Zabel, 2000
						Dsw=Do*(µ0/µsw)			at t (°C)	Φ	θ2		for model		Dsw	in	10-10m2s-1
	mo	m1	t (°C)	D0 (t)		µ0/µsw at t			cm2d-1			cm2d-1	cm2 h-1			0 °C	5°C	10°C
Cl	9.6	0.438	25	20.55	10-6cm2s-1	19.1505	10-6cm2s-1		1.65461	0.8	1.44629	1.14404	0.00411854		Cl	9.13	11.2	13.2	10-10m2s-1
SO4	4.88	0.232	25	10.68	10-6cm2s-1	9.95269	10-6cm2s-1		0.859913	0.8	1.44629	0.594566			SO4	4.64	5.72	6.79	10-10m2s-1
HCO3	5.06	0.275	25	11.935	10-6cm2s-1	11.1222	10-6cm2s-1		0.96096	0.8	1.44629	0.664433			HCO3	4.81	6.09	7.37	10-10m2s-1
CO3	4.33	0.199	25	9.305	10-6cm2s-1	8.67133	10-6cm2s-1		0.749203	0.8	1.44629	0.518018			CO3	4.12	5.04	5.96	10-10m2s-1
Na	6.06	0.297	25	13.485	10-6cm2s-1	12.5667	10-6cm2s-1		1.08576	0.8	1.44629	0.750723			Na	5.76	7.15	8.52	10-10m2s-1
K	9.55	0.409	25	19.775	10-6cm2s-1	18.4283	10-6cm2s-1		1.59221	0.8	1.44629	1.10089			K	9.08	11	12.9	10-10m2s-1
Mg	3.43	0.144	25	7.03	10-6cm2s-1	6.55126	10-6cm2s-1		0.566029	0.8	1.44629	0.391367			Mg	3.26	3.93	4.6	10-10m2s-1
Ca	3.6	0.179	25	8.075	10-6cm2s-1	7.52509	10-6cm2s-1		0.650168	0.8	1.44629	0.449543			Ca	3.42	4.26	5.09	10-10m2s-1		Example
NH4	9.5	0.413	25	19.825	10-6cm2s-1	18.4749	10-6cm2s-1		1.59623	0.8	1.44629	1.10368			NH4	9.03	11	12.9	10-10m2s-1		D0 correction of temperature		PO4				Tortuosity				Dsed diffusion coefficient
Si															H4SiO4	4.59	5.67	6.76	10-10m2s-1		D0 = (m0+m1*t)	Boudreau,1997					θ2 = 1 – ln (Φ2) (Boudreau, 1997)				Dsed = D0 / θ2
PO4	2.62	0.143	25	6.195	10-6cm2s-1	5.77312	10-6cm2s-1		0.498798	0.8	1.44629	0.344881			PO4	2.49	3.16	3.82	10-10m2s-1
O2															O2	10	12.3	14.6	10-10m2s-1		mo	m1	t (°C)	D0 (t=3.5°C)	10-6cm2s-1		Φ	θ2			Dsed
Boudreau,1997	SW-salt water correction																				3.1	0.143	3.5	3.6005	10-6cm2s-1		0.8	1.44629			2.48948	10-6cm2s-1
Dsw=Do*(µ0/µsw)
	t (°C)	µ0/µsw
	0	0.9506
	5	0.947
	10	0.9437
	15	0.9397
	20	0.9364
	25	0.9319
31536000

## Sheet: table 2
Model diffusion Chlorid, 25°C, Porosity 0.8,			Result:	~50-55 h
Model diffusion Chlorid						switch
						1
dx (cm)		dt(h)	C0 mmol/l		Cb mmol/l
1		1	725		1355
dx (cm)	Φ	Ds	flux
		cm2 h-1	µmol cm-2 h-1
0	0.8	0.00411854	-2.07574		725
1	0.8	0.00411854	0		1355
2	0.8	0.00411854	0		1355
3	0.8	0.00411854	0		1355
4	0.8	0.00411854	0		1355
5	0.8	0.00411854	0		1355
6	0.8	0.00411854	0		1355
7	0.8	0.00411854	0		1355
8	0.8	0.00411854	0		1355
9	0.8	0.00411854	0		1355
10	0.8	0.00411854	0		1355
11	0.8	0.00411854	0		1355
12	0.8	0.00411854	0		1355
13	0.8	0.00411854	0		1355
14	0.8	0.00411854	0		1355
15	0.8	0.00411854	0		1355
16	0.8	0.00411854	0		1355
17	0.8	0.00411854	0		1355
18	0.8	0.00411854	0		1355
19	0.8	0.00411854	0		1355
20	0.8	0.00411854	0		1355
21	0.8	0.00411854	0		1355
22	0.8	0.00411854	0		1355
23	0.8	0.00411854	0		1355
24	0.8	0.00411854	0		1355
25	0.8	0.00411854	0		1355
26	0.8	0.00411854	0		1355
27	0.8	0.00411854	0		1355
28	0.8	0.00411854	0		1355
29	0.8	0.00411854	0		1355
30	0.8	0.00411854	0		1355
31					1355
0					726.003			37.5437
2					903.671			45.1446
4.5					1057.48			56.197
7					1199.15			63.7703
10					1314.61			69.6639
13					1356.77			70.7066
16.5					1359.02			70.6192
20					1356.44			70.3543
23.5					1349.45			70.4046
27					1349.71			70.3142
30.5					1321.79			68.3501

## Sheet: table 3
Model diffusion Chlorid, 20°C, Porosity 0.6,			Result:	~100-110 h
Model diffusion Chlorid						switch
						1
dx (cm)		dt(h)	C0 mmol/l		Cb mmol/l
1		1	725		1355
dx (cm)	Φ	Ds	flux
		cm2 h-1	µmol cm-2 h-1
0	0.6	0.00264511	-0.999852		725
1	0.6	0.00264511	0		1355
2	0.6	0.00264511	0		1355
3	0.6	0.00264511	0		1355
4	0.6	0.00264511	0		1355
5	0.6	0.00264511	0		1355
6	0.6	0.00264511	0		1355
7	0.6	0.00264511	0		1355
8	0.6	0.00264511	0		1355
9	0.6	0.00264511	0		1355
10	0.6	0.00264511	0		1355
11	0.6	0.00264511	0		1355
12	0.6	0.00264511	0		1355
13	0.6	0.00264511	0		1355
14	0.6	0.00264511	0		1355
15	0.6	0.00264511	0		1355
16	0.6	0.00264511	0		1355
17	0.6	0.00264511	0		1355
18	0.6	0.00264511	0		1355
19	0.6	0.00264511	0		1355
20	0.6	0.00264511	0		1355
21	0.6	0.00264511	0		1355
22	0.6	0.00264511	0		1355
23	0.6	0.00264511	0		1355
24	0.6	0.00264511	0		1355
25	0.6	0.00264511	0		1355
26	0.6	0.00264511	0		1355
27	0.6	0.00264511	0		1355
28	0.6	0.00264511	0		1355
29	0.6	0.00264511	0		1355
30	0.6	0.00264511	0		1355
31					1355
0					726.003			37.5437
2					903.671			45.1446
4.5					1057.48			56.197
7					1199.15			63.7703
10					1314.61			69.6639
13					1356.77			70.7066
16.5					1359.02			70.6192
20					1356.44			70.3543
23.5					1349.45			70.4046
27					1349.71			70.3142
30.5					1321.79			68.3501
